# Supplementary material for: Using ERIC to Assess Implementation Science in Drowning Prevention Interventions in High-Income Countries: A Systematic Review
Source: MDPI journal article supplement (doi:10.3390/ijerph21010045), 2023-12-27
Supplement: s1 [file s1]

Supplementary Table S1: Systematic review search strategy (October 2022)

| SEARCH ENGINE  | SEARCH KEYWORDS                                                                                                                                                                                                                              | HITS <sup>^</sup> |
|----------------|----------------------------------------------------------------------------------------------------------------------------------------------------------------------------------------------------------------------------------------------|-------------------|
| Medline        | (implement* or disseminat* or quality or evidence* or methodolog* or success* or translat*) AND (Implementation Science/ Evidence-Based Practice/ Program Evaluation/)                                                                       | > 4 million       |
|                | (drown* and (prevent* or reduc*)) OR (drowning or near drowning/)                                                                                                                                                                            | 2477              |
|                | (implement* or disseminat* or quality or evidence* or methodolog* or success* or translat*) and (Implementation Science/ Evidence-Based Practice/ Program Evaluation/) AND (drown* and (prevent* or reduc*)) OR (drowning or near drowning/) | 606               |
|                |                                                                                                                                                                                                                                              |                   |
| PubMed         | (implement* or disseminat* or quality or evidence* or methodolog* or success* or translat*)                                                                                                                                                  | > 5 million       |
|                | (drown* and (prevent* or reduc*))                                                                                                                                                                                                            | 2303              |
|                | (implement* or disseminat* or quality or evidence* or methodolog* or success* or translat*) AND (drown* and (prevent* or reduc*))                                                                                                            | 464               |
| Global health  | (implement* or disseminat* or quality or evidence* or methodolog* or success* or translat*) AND (Implementation Science/ Evidence-Based Practice/ Program Evaluation/)                                                                       | > 1 million       |
|                | (drown* and (prevent* or reduc*)) OR (drowning or near drowning/)                                                                                                                                                                            | 541               |
|                | (implement* or disseminat* or quality or evidence* or methodolog* or success* or translat*) and (Implementation Science/ Evidence-Based Practice/ Program Evaluation/) AND (drown* and (prevent* or reduc*)) OR (drowning or near drowning/) | 194               |
|                |                                                                                                                                                                                                                                              |                   |
| ProQuest       | noft (drown* and (prevent* or reduc*)) AND noft ((implement* or disseminat* or quality or evidence* or methodolog* or success* or translat*))                                                                                                | 1058              |
|                | noft (drown* NEAR/5 (prevent* or reduc*)) AND noft ((implement* or disseminat* or quality or evidence* or methodolog* or success* or translat*))                                                                                             | 344               |
| PsycINFO       | (implement* or disseminat* or quality or evidence* or methodolog* or success* or translat*) AND (Implementation Science/ Evidence-Based Practice/ Program Evaluation/)                                                                       | > 1 million       |
|                | (drown* and (prevent* or reduc*)) OR (drowning or near drowning/)                                                                                                                                                                            | 262               |
|                | (implement* or disseminat* or quality or evidence* or methodolog* or success* or translat*) and (Implementation Science/ Evidence-Based Practice/ Program Evaluation/) AND (drown* and (prevent* or reduc*)) OR (drowning or near drowning/) | 88                |
|                |                                                                                                                                                                                                                                              |                   |
| Web of Science | (implement* or disseminat* or quality or evidence* or methodolog* or success* or translat*)                                                                                                                                                  | > 15 million      |
|                | (drown* and (prevent* or reduc*)) OR (drowning or near drowning/)                                                                                                                                                                            | 3487              |
|                | (implement* or disseminat* or quality or evidence* or methodolog* or success* or translat*) AND (drown* and (prevent* or reduc*))                                                                                                            | 894               |
| Scopus         | (implement* or disseminat* or quality or evidence* or methodolog* or success* or translat*)                                                                                                                                                  | > 24 million      |
|                | (drown* and (prevent* or reduc*))                                                                                                                                                                                                            | 2661              |
|                | (implement* or disseminat* or quality or evidence* or methodolog* or success* or translat*) AND (drown* and (prevent* or reduc*))                                                                                                            | 901               |
| SPORTDiscus    | (implement* or disseminat* or quality or evidence* or methodolog* or success* or translat*)                                                                                                                                                  | 160451            |
|                | (drown* and (prevent* or reduc*))                                                                                                                                                                                                            | 194               |
|                | (implement* or disseminat* or quality or evidence* or methodolog* or success* or translat*) AND (drown* and (prevent* or reduc*))                                                                                                            | 57                |

<sup>^</sup>Database search undertaken October 2022



Supplementary Table S2: Prisma Checklist Abstract

| Section and Topic       | Item # | Checklist item                                                                                                                                                                                                                                                                                        | Reported (Yes/No) |
|-------------------------|--------|-------------------------------------------------------------------------------------------------------------------------------------------------------------------------------------------------------------------------------------------------------------------------------------------------------|-------------------|
| <b>TITLE</b>            |        |                                                                                                                                                                                                                                                                                                       |                   |
| Title                   | 1      | Identify the report as a systematic review.                                                                                                                                                                                                                                                           | yes               |
| <b>BACKGROUND</b>       |        |                                                                                                                                                                                                                                                                                                       |                   |
| Objectives              | 2      | Provide an explicit statement of the main objective(s) or question(s) the review addresses.                                                                                                                                                                                                           | yes               |
| <b>METHODS</b>          |        |                                                                                                                                                                                                                                                                                                       |                   |
| Eligibility criteria    | 3      | Specify the inclusion and exclusion criteria for the review.                                                                                                                                                                                                                                          | yes               |
| Information sources     | 4      | Specify the information sources (e.g. databases, registers) used to identify studies and the date when each was last searched.                                                                                                                                                                        | yes               |
| Risk of bias            | 5      | Specify the methods used to assess risk of bias in the included studies.                                                                                                                                                                                                                              | no                |
| Synthesis of results    | 6      | Specify the methods used to present and synthesise results.                                                                                                                                                                                                                                           | yes               |
| <b>RESULTS</b>          |        |                                                                                                                                                                                                                                                                                                       |                   |
| Included studies        | 7      | Give the total number of included studies and participants and summarise relevant characteristics of studies.                                                                                                                                                                                         | yes               |
| Synthesis of results    | 8      | Present results for main outcomes, preferably indicating the number of included studies and participants for each. If meta-analysis was done, report the summary estimate and confidence/credible interval. If comparing groups, indicate the direction of the effect (i.e. which group is favoured). | yes               |
| <b>DISCUSSION</b>       |        |                                                                                                                                                                                                                                                                                                       |                   |
| Limitations of evidence | 9      | Provide a brief summary of the limitations of the evidence included in the review (e.g. study risk of bias, inconsistency and imprecision).                                                                                                                                                           | no                |
| Interpretation          | 10     | Provide a general interpretation of the results and important implications.                                                                                                                                                                                                                           | yes               |
| <b>OTHER</b>            |        |                                                                                                                                                                                                                                                                                                       |                   |
| Funding                 | 11     | Specify the primary source of funding for the review.                                                                                                                                                                                                                                                 | no                |
| Registration            | 12     | Provide the register name and registration number.                                                                                                                                                                                                                                                    | yes               |

*From:* Page MJ, McKenzie JE, Bossuyt PM, Boutron I, Hoffmann TC, Mulrow CD, et al. The PRISMA 2020 statement: an updated guideline for reporting systematic reviews. *BMJ* 2021;372:n71. doi: 10.1136/bmj.n71



Supplementary Table S3: Prisma Checklist Manuscript

| Section and Topic             | Item Number | Checklist item                                                                                                                                                                                                                                                                                       | Location where item is reported  |
|-------------------------------|-------------|------------------------------------------------------------------------------------------------------------------------------------------------------------------------------------------------------------------------------------------------------------------------------------------------------|----------------------------------|
| <b>TITLE</b>                  |             |                                                                                                                                                                                                                                                                                                      |                                  |
| Title                         | 1           | Identify the report as a systematic review.                                                                                                                                                                                                                                                          | Page 1                           |
| <b>ABSTRACT</b>               |             |                                                                                                                                                                                                                                                                                                      |                                  |
| Abstract                      | 2           | See the PRISMA 2020 for Abstracts checklist.                                                                                                                                                                                                                                                         | Supplementary Table 2            |
| <b>INTRODUCTION</b>           |             |                                                                                                                                                                                                                                                                                                      |                                  |
| Rationale                     | 3           | Describe the rationale for the review in the context of existing knowledge.                                                                                                                                                                                                                          | Page 1 - 3                       |
| Objectives                    | 4           | Provide an explicit statement of the objective(s) or question(s) the review addresses.                                                                                                                                                                                                               | Page 3                           |
| <b>METHODS</b>                |             |                                                                                                                                                                                                                                                                                                      |                                  |
| Eligibility criteria          | 5           | Specify the inclusion and exclusion criteria for the review and how studies were grouped for the syntheses.                                                                                                                                                                                          | Page 3 & Table 1                 |
| Information sources           | 6           | Specify all databases, registers, websites, organisations, reference lists and other sources searched or consulted to identify studies. Specify the date when each source was last searched or consulted.                                                                                            | Page 4 and Supplementary table 1 |
| Search strategy               | 7           | Present the full search strategies for all databases, registers and websites, including any filters and limits used.                                                                                                                                                                                 | Supplementary table 1            |
| Selection process             | 8           | Specify the methods used to decide whether a study met the inclusion criteria of the review, including how many reviewers screened each record and each report retrieved, whether they worked independently, and if applicable, details of automation tools used in the process.                     | Page 3 -5                        |
| Data collection process       | 9           | Specify the methods used to collect data from reports, including how many reviewers collected data from each report, whether they worked independently, any processes for obtaining or confirming data from study investigators, and if applicable, details of automation tools used in the process. | Page 4                           |
| Data items                    | 10a         | List and define all outcomes for which data were sought. Specify whether all results that were compatible with each outcome domain in each study were sought (e.g. for all measures, time points, analyses), and if not, the methods used to decide which results to collect.                        | Page 5                           |
|                               | 10b         | List and define all other variables for which data were sought (e.g. participant and intervention characteristics, funding sources). Describe any assumptions made about any missing or unclear information.                                                                                         | Page 5                           |
| Study risk of bias assessment | 11          | Specify the methods used to assess risk of bias in the included studies, including details of the tool(s) used, how many reviewers assessed each study and whether they worked independently, and if applicable, details of automation tools used in the process.                                    | Page 4 -5                        |
| Effect                        | 12          | Specify for each outcome the effect measure(s) (e.g. risk                                                                                                                                                                                                                                            | Not included                     |



| Section and Topic             | Item Number | Checklist item                                                                                                                                                                                                                                              | Location where item is reported |
|-------------------------------|-------------|-------------------------------------------------------------------------------------------------------------------------------------------------------------------------------------------------------------------------------------------------------------|---------------------------------|
| measures                      |             | ratio, mean difference) used in the synthesis or presentation of results.                                                                                                                                                                                   |                                 |
| Synthesis methods             | 13a         | Describe the processes used to decide which studies were eligible for each synthesis (e.g. tabulating the study intervention characteristics and comparing against the planned groups for each synthesis (item #5)).                                        | Page 4                          |
|                               | 13b         | Describe any methods required to prepare the data for presentation or synthesis, such as handling of missing summary statistics, or data conversions.                                                                                                       | Footnote table 3                |
|                               | 13c         | Describe any methods used to tabulate or visually display results of individual studies and syntheses.                                                                                                                                                      | Page 5                          |
|                               | 13d         | Describe any methods used to synthesize results and provide a rationale for the choice(s). If meta-analysis was performed, describe the model(s), method(s) to identify the presence and extent of statistical heterogeneity, and software package(s) used. | Not included                    |
|                               | 13e         | Describe any methods used to explore possible causes of heterogeneity among study results (e.g. subgroup analysis, meta-regression).                                                                                                                        | Not included                    |
|                               | 13f         | Describe any sensitivity analyses conducted to assess robustness of the synthesized results.                                                                                                                                                                | Not included                    |
| Reporting bias assessment     | 14          | Describe any methods used to assess risk of bias due to missing results in a synthesis (arising from reporting biases).                                                                                                                                     | Not included                    |
| Certainty assessment          | 15          | Describe any methods used to assess certainty (or confidence) in the body of evidence for an outcome.                                                                                                                                                       | Not included                    |
| <b>RESULTS</b>                |             |                                                                                                                                                                                                                                                             |                                 |
| Study selection               | 16a         | Describe the results of the search and selection process, from the number of records identified in the search to the number of studies included in the review, ideally using a flow diagram.                                                                | Page 4                          |
|                               | 16b         | Cite studies that might appear to meet the inclusion criteria, but which were excluded, and explain why they were excluded.                                                                                                                                 | Page 4                          |
| Study characteristics         | 17          | Cite each included study and present its characteristics.                                                                                                                                                                                                   | Table 3                         |
| Risk of bias in studies       | 18          | Present assessments of risk of bias for each included study.                                                                                                                                                                                                | Page 4                          |
| Results of individual studies | 19          | For all outcomes, present, for each study: (a) summary statistics for each group (where appropriate) and (b) an effect estimate and its precision (e.g. confidence/credible interval), ideally using structured tables or plots.                            | Table 4                         |
| Results of syntheses          | 20a         | For each synthesis, briefly summarise the characteristics and risk of bias among contributing studies.                                                                                                                                                      | Table 4                         |
|                               | 20b         | Present results of all statistical syntheses conducted. If meta-analysis was done, present for each the summary estimate and its precision (e.g. confidence/credible interval)                                                                              | Page 6 - 10                     |



| Section and Topic                              | Item Number | Checklist item                                                                                                                                                                                                                             | Location where item is reported         |
|------------------------------------------------|-------------|--------------------------------------------------------------------------------------------------------------------------------------------------------------------------------------------------------------------------------------------|-----------------------------------------|
|                                                |             | and measures of statistical heterogeneity. If comparing groups, describe the direction of the effect.                                                                                                                                      |                                         |
|                                                | 20c         | Present results of all investigations of possible causes of heterogeneity among study results.                                                                                                                                             | Page 6 - 10                             |
|                                                | 20d         | Present results of all sensitivity analyses conducted to assess the robustness of the synthesized results.                                                                                                                                 | Not included                            |
| Reporting biases                               | 21          | Present assessments of risk of bias due to missing results (arising from reporting biases) for each synthesis assessed.                                                                                                                    | Page 13                                 |
| Certainty of evidence                          | 22          | Present assessments of certainty (or confidence) in the body of evidence for each outcome assessed.                                                                                                                                        | Not included                            |
| <b>DISCUSSION</b>                              |             |                                                                                                                                                                                                                                            |                                         |
| Discussion                                     | 23a         | Provide a general interpretation of the results in the context of other evidence.                                                                                                                                                          | Page 10 -13                             |
|                                                | 23b         | Discuss any limitations of the evidence included in the review.                                                                                                                                                                            | Page 10 -13                             |
|                                                | 23c         | Discuss any limitations of the review processes used.                                                                                                                                                                                      | Page 13                                 |
|                                                | 23d         | Discuss implications of the results for practice, policy, and future research.                                                                                                                                                             | Page 12                                 |
| <b>OTHER INFORMATION</b>                       |             |                                                                                                                                                                                                                                            |                                         |
| Registration and protocol                      | 24a         | Provide registration information for the review, including register name and registration number, or state that the review was not registered.                                                                                             | Page 3                                  |
|                                                | 24b         | Indicate where the review protocol can be accessed, or state that a protocol was not prepared.                                                                                                                                             | Page 3                                  |
|                                                | 24c         | Describe and explain any amendments to information provided at registration or in the protocol.                                                                                                                                            | Not relevant                            |
| Support                                        | 25          | Describe sources of financial or non-financial support for the review, and the role of the funders or sponsors in the review.                                                                                                              | Acknowledgements                        |
| Competing interests                            | 26          | Declare any competing interests of review authors.                                                                                                                                                                                         | Conflict of interest                    |
| Availability of data, code and other materials | 27          | Report which of the following are publicly available and where they can be found: template data collection forms; data extracted from included studies; data used for all analyses; analytic code; any other materials used in the review. | All available from corresponding author |

*From:* Page MJ, McKenzie JE, Bossuyt PM, Boutron I, Hoffmann TC, Mulrow CD, et al. The PRISMA 2020 statement: an updated guideline for reporting systematic reviews. *BMJ* 2021;372:n71. doi: 10.1136/bmj.n71



Supplementary Table S4: Refinement of the ERIC strategies

| <b>ORIGINAL WITH (COMMUNITY SETTING CHANGES)</b>            |                                                                                                                                                                                                                                                                                                                                                                                                  | <b>THIS RESEARCH</b>                                        |                                                                                                                                                                                                                                                                                                                                                                                        |                               |
|-------------------------------------------------------------|--------------------------------------------------------------------------------------------------------------------------------------------------------------------------------------------------------------------------------------------------------------------------------------------------------------------------------------------------------------------------------------------------|-------------------------------------------------------------|----------------------------------------------------------------------------------------------------------------------------------------------------------------------------------------------------------------------------------------------------------------------------------------------------------------------------------------------------------------------------------------|-------------------------------|
| ERIC CONCEPTS & STRATEGIES                                  | DEFINITION                                                                                                                                                                                                                                                                                                                                                                                       | CONCEPTS & STRATEGIES                                       | DEFINITION                                                                                                                                                                                                                                                                                                                                                                             | CONCEPT & STRATEGY IDENTIFIER |
| CONCEPT 1: Use evaluative and iterative strategies          |                                                                                                                                                                                                                                                                                                                                                                                                  | CONCEPT 1: Use evaluative and iterative strategies          |                                                                                                                                                                                                                                                                                                                                                                                        |                               |
| Assess for readiness and identify barriers and facilitators | Assess various aspects of an organization to determine its degree of readiness to implement, barriers that may impede implementation, and strengths that can be used in the implementation effort                                                                                                                                                                                                | Assess for readiness and identify barriers and facilitators | Assess various aspects of an organisation to determine its degree of readiness to implement, barriers that may impede implementation, and strengths that can be used in the implementation effort.                                                                                                                                                                                     | c1_01                         |
| Audit and provide feedback                                  | Collect and summarize <i>clinical</i> performance data over a specified time period and give it to <i>clinicians</i> and administrators to monitor, evaluate, and modify provider behaviour.                                                                                                                                                                                                     | Audit and provide feedback                                  | Collect and summarize <b>intervention</b> performance data over a specified time period and give it to <b>providers</b> and administrators to monitor, evaluate, and modify provider behaviour.                                                                                                                                                                                        | c1_02                         |
| Conduct cyclical small tests of change                      | Implement changes in a cyclical fashion using small tests of change before taking changes system-wide. Tests of change benefit from systematic measurement, and results of the tests of change are studied for insights on how to do better. This process continues serially over time, and refinement is added with each cycle.                                                                 | Conduct cyclical small tests of change                      | Implement changes in a cyclical fashion using small tests of change before taking changes system-wide. Tests of change benefit from systematic measurement, and results of the tests of change are studied for insights on how to do better. This process continues serially over time, and refinement is added with each cycle.                                                       | c1_03                         |
| Conduct local needs assessment                              | Collect and analyse data related to the need for the <i>innovation</i>                                                                                                                                                                                                                                                                                                                           | Conduct local needs assessment                              | Collect and analyse data related to the need for the <b>intervention (with the target group or their support network)</b>                                                                                                                                                                                                                                                              | c1_04                         |
| Develop a formal implementation blueprint                   | Develop a formal implementation blueprint that includes all goals and strategies. The blueprint should include the following: 1) aim/purpose of the implementation; 2) scope of the change (e.g., what organizational units are affected); 3) timeframe and milestones; and 4) appropriate performance/progress measures. Use and update this plan to guide the implementation effort over time. | Develop a formal implementation blueprint                   | Develop a formal implementation blueprint that includes all goals and strategies. The blueprint should include the following: 1) aim/purpose of the implementation; 2) scope of the change (e.g., what organizational units are affected); 3) timeframe and milestones; and 4) appropriate performance/progress measures. Use and update this plan to guide the implementation effort. | c1_05                         |



| ORIGINAL WITH (COMMUNITY SETTING CHANGES)                                                              |                                                                                                                                                                                                                                                                                                 | THIS RESEARCH                                          |                                                                                                                                                                                                                                                                                                   |                               |
|--------------------------------------------------------------------------------------------------------|-------------------------------------------------------------------------------------------------------------------------------------------------------------------------------------------------------------------------------------------------------------------------------------------------|--------------------------------------------------------|---------------------------------------------------------------------------------------------------------------------------------------------------------------------------------------------------------------------------------------------------------------------------------------------------|-------------------------------|
| ERIC CONCEPTS & STRATEGIES                                                                             | DEFINITION                                                                                                                                                                                                                                                                                      | CONCEPTS & STRATEGIES                                  | DEFINITION                                                                                                                                                                                                                                                                                        | CONCEPT & STRATEGY IDENTIFIER |
| Develop and implement tools for quality-monitoring                                                     | Develop, test, and introduce into quality-monitoring systems the right input—the appropriate language, protocols, algorithms, standards, and measures (of processes, patient/consumer outcomes, and implementation outcomes) that are often specific to the <i>innovation</i> being implemented | Develop and implement tools for quality-monitoring     | Develop, test, and introduce into quality-monitoring systems the right input—the appropriate language, protocols, algorithms, standards, and measures (of processes, patient/consumer outcomes, and implementation outcomes) that are often specific to the <b>intervention</b> being implemented | c1_06                         |
| Develop and organize quality-monitoring systems                                                        | Develop and organize systems and procedures that monitor <i>clinical</i> processes and/or outcomes for the purpose of quality assurance and improvement.                                                                                                                                        | Develop and organize quality-monitoring systems        | Develop and organize systems and procedures that monitor intervention processes and/or outcomes for the purpose of quality assurance and improvement.                                                                                                                                             | c1_07                         |
| Obtain and use <i>patients/consumers &amp; family</i> (priority population & support network) feedback | Develop strategies to increase <i>patient/consumer and family</i> feedback on the implementation effort                                                                                                                                                                                         | Obtain and use target group & support network feedback | Develop strategies to increase <b>target group and support networks</b> feedback on the implementation effort                                                                                                                                                                                     | c1_08                         |
| Purposely re-examine the implementation                                                                | Monitor progress and adjust <i>clinical</i> practices and implementation strategies to continuously improve the quality of care                                                                                                                                                                 | Purposely re-examine the implementation                | Monitor progress and adjust <b>intervention</b> practices and implementation strategies to continuously improve the quality of the <b>intervention</b>                                                                                                                                            | c1_09                         |
| Stage implementation scale-up                                                                          | Phase implementation efforts by starting with small pilots or demonstration projects and gradually move to a system wide rollout                                                                                                                                                                | Stage implementation scale-up                          | Phase implementation efforts by starting with small pilots or demonstration projects and gradually move to a system wide rollout                                                                                                                                                                  | c1_10                         |
| CONCEPT 2: Provide interactive assistance                                                              |                                                                                                                                                                                                                                                                                                 | CONCEPT 2: Provide interactive assistance              |                                                                                                                                                                                                                                                                                                   |                               |
| Centralise technical assistance                                                                        | Develop and use a centralized system to deliver technical assistance focused on implementation issues                                                                                                                                                                                           | *Centralise technical assistance                       | Develop and use a centralized system to deliver technical assistance focused on implementation issues                                                                                                                                                                                             | c2_01                         |
| Facilitation                                                                                           | A process of interactive problem solving and support that occurs in a context of a recognized need for improvement and a supportive interpersonal relationship                                                                                                                                  | Facilitation                                           | A process of interactive problem solving and support that occurs in a context of a recognized need for improvement and a supportive interpersonal relationship                                                                                                                                    | c2_02                         |



| ORIGINAL WITH (COMMUNITY SETTING CHANGES) |                                                                                                                                                                                                                | THIS RESEARCH                            |                                                                                                                                                                                                  |                               |
|-------------------------------------------|----------------------------------------------------------------------------------------------------------------------------------------------------------------------------------------------------------------|------------------------------------------|--------------------------------------------------------------------------------------------------------------------------------------------------------------------------------------------------|-------------------------------|
| ERIC CONCEPTS & STRATEGIES                | DEFINITION                                                                                                                                                                                                     | CONCEPTS & STRATEGIES                    | DEFINITION                                                                                                                                                                                       | CONCEPT & STRATEGY IDENTIFIER |
| Provide technical assistance              | Develop and use a system to deliver technical assistance focused on implementation issues using local personnel                                                                                                | Provide technical assistance             | Develop and use a system to deliver technical assistance focused on implementation issues using local personnel                                                                                  | c2_03                         |
| Provide <i>clinical</i> supervision       | Provide <i>clinicians</i> with ongoing supervision focusing on the <i>innovation</i> . Provide training for <i>clinical</i> supervisors who will supervise <i>clinicians</i> who provide the <i>innovation</i> | Provide supervision                      | Provide <b>providers</b> with ongoing supervision focusing on the <b>intervention</b> . Provide training for provider supervisors who will supervise <b>providers</b> of the <b>intervention</b> | c2_04                         |
| CONCEPT 3: Adapt and tailor context       |                                                                                                                                                                                                                | CONCEPT 3: Adapt and tailor context      |                                                                                                                                                                                                  |                               |
| Promote adaptability                      | Identify the ways a <i>clinical</i> innovation can be tailored to meet local needs and clarify which elements of the <i>innovation</i> must be maintained to preserve fidelity                                 | Promote adaptability                     | Identify the ways an <b>intervention</b> can be tailored to meet local needs and clarify which elements of <b>the intervention</b> must be maintained to preserve fidelity                       | c3_01                         |
| Tailor strategies                         | Tailor the implementation strategies to address barriers and leverage facilitators that were identified through earlier data collection                                                                        | Tailor strategies                        | Tailor the implementation strategies to address barriers and leverage facilitators that were identified through earlier data collection                                                          | c3_02                         |
| Use data experts                          | Involve, hire, and/or consult experts to inform management on the use of data generated by implementation efforts                                                                                              | *Use data experts                        | Involve, hire, and/or consult experts to inform management on the use of data generated by implementation efforts                                                                                | c3_03                         |
| Use data warehouse techniques             | Integrate <i>clinical</i> records across facilities and organizations to facilitate implementation across systems                                                                                              | *Use data warehouse techniques           | Integrate <b>intervention</b> records across facilities and organizations to facilitate implementation across systems                                                                            | c3_04                         |
| CONCEPT 4: Develop partner relationships  |                                                                                                                                                                                                                | CONCEPT 4: Develop partner relationships |                                                                                                                                                                                                  |                               |
| Build a coalition                         | Recruit and cultivate relationships with partners in the implementation effort.                                                                                                                                | Build a coalition                        | Recruit and cultivate relationships with partners in the implementation effort <b>with partners involved throughout the whole intervention</b>                                                   | c4_01                         |
| Capture and share local knowledge         | Capture local knowledge from implementation sites on how implementers and <i>clinicians</i> made something work in their setting and then share it with other sites                                            | Capture and share local knowledge        | Capture local knowledge from implementation sites on how implementers and <b>providers</b> made something work in their setting and then share it with other sites                               | c4_02                         |



| ORIGINAL WITH (COMMUNITY SETTING CHANGES) |                                                                                                                                                                                                                                           | THIS RESEARCH                       |                                                                                                                                                                                                                                                   |                               |
|-------------------------------------------|-------------------------------------------------------------------------------------------------------------------------------------------------------------------------------------------------------------------------------------------|-------------------------------------|---------------------------------------------------------------------------------------------------------------------------------------------------------------------------------------------------------------------------------------------------|-------------------------------|
| ERIC CONCEPTS & STRATEGIES                | DEFINITION                                                                                                                                                                                                                                | CONCEPTS & STRATEGIES               | DEFINITION                                                                                                                                                                                                                                        | CONCEPT & STRATEGY IDENTIFIER |
| Conduct local consensus discussions       | Collect and analyse data related to the need for the <i>innovation</i>                                                                                                                                                                    | Conduct local consensus discussions | Collect and analyse data related to the need for the <b>innovation (done with stakeholders)</b>                                                                                                                                                   | c4_03                         |
| Develop academic partnerships             | Partner with a university or academic unit for the purposes of shared training and bringing research skills to an implementation project                                                                                                  | Develop academic partnerships       | Partner with a university or academic unit for the purposes of shared training and bringing research skills to an implementation project                                                                                                          | c4_04                         |
| Develop an implementation glossary        | Develop and distribute a list of terms describing the <i>innovation</i> , implementation, and stakeholders in the organizational change                                                                                                   | Develop an implementation glossary  | Develop and distribute a list of terms describing the <b>intervention</b> , implementation, and stakeholders in the organisational change                                                                                                         | c4_05                         |
| Identify and prepare champions            | Identify and prepare individuals who dedicate themselves to supporting, marketing, and driving through an implementation, overcoming indifference or resistance that the intervention may provoke in an organization (intended community) | Identify and prepare champions      | Identify and prepare individuals who dedicate themselves to supporting, marketing, and driving through an implementation, overcoming indifference or resistance that the intervention may provoke in an organization <b>or</b> intended community | c4_06                         |
| Identify early adopters                   | Identify early adopters at the local site to learn from their experiences with the practice <i>innovation</i>                                                                                                                             | Identify early adopters             | Identify early adopters at the local site to learn from their experiences with the practice <b>intervention</b>                                                                                                                                   | c4_07                         |
| Inform local opinion leaders              | Inform providers identified by colleagues as opinion leaders or “educationally influential” about the <i>clinical innovation</i> in the hopes that they will influence colleagues to adopt it                                             | Inform local opinion leaders        | Inform providers identified by colleagues as opinion leaders or “educationally influential” about the <b>intervention</b> in the hopes that they will influence colleagues to adopt it                                                            | c4_08                         |
| Involve executive boards                  | Involve existing governing structures (e.g., boards of directors, medical staff boards of governance) in the implementation effort, including the review of data on implementation processes                                              | Involve executive boards            | Involve existing governing structures (e.g., boards of directors, medical staff boards of governance) in the implementation effort, including the review of data on implementation processes                                                      | c4_09                         |
| Model and simulate change                 | Model or simulate the change that will be implemented prior to implementation                                                                                                                                                             | Model and simulate change           | Model or simulate the change that will be implemented prior to implementation                                                                                                                                                                     | c4_10                         |
| Obtain formal commitments                 | Obtain written commitments from key partners that state what they will do to implement the innovation                                                                                                                                     | Obtain formal commitments           | Obtain written commitments from key partners that state what they will do to implement the intervention                                                                                                                                           | c4_11                         |



| ORIGINAL WITH (COMMUNITY SETTING CHANGES)              |                                                                                                                                                                                                                                                                                               | THIS RESEARCH                                    |                                                                                                                                                                                                                                                                                                 |                               |
|--------------------------------------------------------|-----------------------------------------------------------------------------------------------------------------------------------------------------------------------------------------------------------------------------------------------------------------------------------------------|--------------------------------------------------|-------------------------------------------------------------------------------------------------------------------------------------------------------------------------------------------------------------------------------------------------------------------------------------------------|-------------------------------|
| ERIC CONCEPTS & STRATEGIES                             | DEFINITION                                                                                                                                                                                                                                                                                    | CONCEPTS & STRATEGIES                            | DEFINITION                                                                                                                                                                                                                                                                                      | CONCEPT & STRATEGY IDENTIFIER |
| Organise <i>clinician</i> implementation team meetings | Develop and support teams of <i>clinicians</i> who are implementing the <i>innovation</i> and give them protected time to reflect on the implementation effort, share lessons learned, and support one another's learning                                                                     | Organise implementation team meetings            | Develop and support teams of <b>providers</b> who are implementing the intervention and give them protected time to reflect on the implementation effort, share lessons learned, and support one another's learning                                                                             | c4_12                         |
| Promote network <i>weavings</i>                        | Identify and build on existing high-quality working relationships and networks within and outside the organization, organizational units, teams, etc. to promote information sharing, collaborative problem-solving, and a shared vision/goal related to implementing the <i>innovation</i> . | Promote network <b>collaboration</b>             | Identify and build on existing high-quality working relationships and networks within and outside the organization, organizational units, teams, etc. to promote information sharing, collaborative problem-solving, and a shared vision/goal related to implementing the <b>intervention</b> . | c4_13                         |
| Recruit, designate and train for leadership            | Recruit, designate, and train leaders for the change effort                                                                                                                                                                                                                                   | Recruit, designate and train for leadership      | Recruit, designate, and train leaders for the change effort                                                                                                                                                                                                                                     | c4_14                         |
| Use advisory boards and workgroups                     | Create and engage a formal group of multiple kinds of stakeholders to provide input and advice on implementation efforts and to elicit recommendations for improvements.                                                                                                                      | Use advisory boards and workgroups               | Create and engage a formal group of multiple kinds of stakeholders to provide input and advice on implementation efforts and to elicit recommendations for improvements.                                                                                                                        | c4_15                         |
| Use an implementation advisor                          | Seek guidance from experts in implementation                                                                                                                                                                                                                                                  | Use an implementation advisor                    | Seek guidance from experts in implementation                                                                                                                                                                                                                                                    | c4_16                         |
| Visit other sites                                      | Visit sites where a similar implementation effort has been considered successful                                                                                                                                                                                                              | Visit other sites                                | Visit sites where a similar implementation effort has been considered successful                                                                                                                                                                                                                | c4_17                         |
| CONCEPT 5: Train and educate <i>collaborators</i>      |                                                                                                                                                                                                                                                                                               | CONCEPT 5: Train and educate <b>stakeholders</b> |                                                                                                                                                                                                                                                                                                 |                               |
| Conduct educational meetings                           | Hold meetings targeted toward different stakeholder groups (e.g., providers, administrators, other organizational stakeholders, and community, <i>patient/consumer, and family</i> stakeholders) to teach them about the <i>clinical innovation</i>                                           | Conduct educational meetings                     | Hold meetings targeted toward different stakeholder groups (e.g., providers, administrators, other organizational stakeholders, and <b>target group, and support network</b> stakeholders) to teach them about the <b>intervention</b>                                                          | c5_01                         |



| ORIGINAL WITH (COMMUNITY SETTING CHANGES) |                                                                                                                                                                                                                                         | THIS RESEARCH                       |                                                                                                                                                                                                                                   |                               |
|-------------------------------------------|-----------------------------------------------------------------------------------------------------------------------------------------------------------------------------------------------------------------------------------------|-------------------------------------|-----------------------------------------------------------------------------------------------------------------------------------------------------------------------------------------------------------------------------------|-------------------------------|
| ERIC CONCEPTS & STRATEGIES                | DEFINITION                                                                                                                                                                                                                              | CONCEPTS & STRATEGIES               | DEFINITION                                                                                                                                                                                                                        | CONCEPT & STRATEGY IDENTIFIER |
| Conduct educational outreach visits       | Have a trained person meet with providers in their <i>practice</i> settings to educate providers about the <i>clinical innovation</i> with the intent of changing the provider's practice                                               | Conduct educational outreach visits | Have a trained person meet with providers in their <b>provider</b> settings to educate providers about the <b>intervention</b> with the intent of changing the provider's practice                                                | c5_02                         |
| Conduct ongoing training                  | Plan for and conduct training in the <i>clinical innovation</i> in an ongoing way                                                                                                                                                       | Conduct ongoing training            | Plan for and conduct training in <b>the intervention or implementation</b> in an ongoing way                                                                                                                                      | c5_03                         |
| Create a learning collaborative           | Facilitate the formation of groups of providers or provider organizations and foster a collaborative learning environment to improve implementation of the <i>clinical innovation</i>                                                   | Create a learning collaborative     | Facilitate the formation of groups of providers or provider organisations and foster a collaborative learning environment to improve implementation of the <b>intervention</b>                                                    | c5_04                         |
| Develop educational materials             | Develop and format manuals, toolkits, and other supporting materials in ways that make it easier for stakeholders to learn about the <i>innovation</i> and for <i>clinicians</i> to learn how to deliver the <i>clinical innovation</i> | Develop educational materials       | Develop and format manuals, toolkits, and other supporting materials in ways that make it easier for stakeholders to learn about the <b>intervention</b> and for <b>providers</b> to learn how to deliver the <b>intervention</b> | c5_05                         |
| Distribute educational materials          | Distribute educational materials (including guidelines, manuals, and toolkits) in person, by mail, and/or electronically                                                                                                                | Distribute educational materials    | Distribute educational materials (including guidelines, manuals, and toolkits) in person, by mail, and/or electronically                                                                                                          | c5_06                         |
| Make training dynamic                     | Vary the information delivery methods to cater to different learning styles and work contexts, and shape the training in the <i>innovation</i> to be interactive                                                                        | Make training dynamic               | Vary the information delivery methods to cater to different learning styles and work contexts, and shape the training in the <b>intervention</b> to be interactive                                                                | c5_07                         |
| Provide ongoing consultation              | Provide ongoing consultation with one or more experts in the strategies used to support implementing the <i>innovation</i>                                                                                                              | Provide ongoing consultation        | Provide ongoing consultation with one or more experts in the strategies used to support implementing the <b>intervention</b>                                                                                                      | c5_08                         |
| Shadow other experts                      | Provide ways for key individuals to directly observe experienced <i>people</i> engage with or use the targeted <i>practice change/innovation</i>                                                                                        | Shadow other experts                | Provide ways for key individuals to directly observe experienced <b>providers</b> engage with or use the targeted <b>intervention</b>                                                                                             | c5_09                         |
| Use train-the-trainer strategies          | Train designated <i>clinicians</i> or organizations to train others in the <i>clinical innovation</i>                                                                                                                                   | Use train-the-trainer strategies    | Train designated <b>providers</b> or organizations to train others in the <b>intervention</b>                                                                                                                                     | c5_10                         |



| ORIGINAL WITH (COMMUNITY SETTING CHANGES)                                         |                                                                                                                                                                                                              | THIS RESEARCH                                                      |                                                                                                                                                                                                              |                               |
|-----------------------------------------------------------------------------------|--------------------------------------------------------------------------------------------------------------------------------------------------------------------------------------------------------------|--------------------------------------------------------------------|--------------------------------------------------------------------------------------------------------------------------------------------------------------------------------------------------------------|-------------------------------|
| ERIC CONCEPTS & STRATEGIES                                                        | DEFINITION                                                                                                                                                                                                   | CONCEPTS & STRATEGIES                                              | DEFINITION                                                                                                                                                                                                   | CONCEPT & STRATEGY IDENTIFIER |
| Work with educational institutions                                                | Encourage educational institutions to train <i>clinicians</i> in the <i>innovation</i>                                                                                                                       | Work with educational institutions                                 | Encourage educational institutions to train <b>providers</b> in the <b>intervention or implementation</b>                                                                                                    | c5_11                         |
| CONCEPT 6: Support <i>clinicians (delivery agents)</i>                            |                                                                                                                                                                                                              | CONCEPT 6: Support <b>providers</b>                                |                                                                                                                                                                                                              |                               |
| Create new <i>clinical (delivery agent)</i> teams                                 | Change who serves on the <i>clinical</i> team, adding different disciplines and different skills to make it more likely that the <i>clinical innovation</i> is delivered (or is more successfully delivered) | Create new provider teams                                          | Change who serves on the <b>provider</b> team, adding different disciplines and different skills to make it more likely that the <b>intervention</b> is delivered (or is more successfully delivered)        | c6_01                         |
| Develop resource sharing agreements                                               | Develop partnerships with organizations that have resources needed to implement the <i>innovation</i>                                                                                                        | Develop resource sharing agreements                                | Develop partnerships with organizations that have resources needed to implement the <b>intervention</b> . <b>Includes cases whereby existing resources were used but no sharing agreement was mentioned.</b> | c6_02                         |
| Facilitate relay of <i>clinical</i> data to providers (delivery agents)           | Provide as close to real-time data as possible about key measures of process/outcomes using integrated modes/channels of communication in a way that promotes use of the targeted <i>innovation</i>          | Facilitate relay of <b>program</b> data to providers               | Provide as close to real-time data as possible about key measures of process/outcomes using integrated modes/channels of communication in a way that promotes use of the targeted <b>intervention</b>        | c6_03                         |
| Reminder <i>clinicians (implementers (agents, volunteers, paraprofessionals))</i> | Develop reminder systems designed to help clinicians to recall information and/or prompt them to use the clinical innovation                                                                                 | Remind providers                                                   | Develop reminder systems designed to help clinicians to recall information and/or prompt them to use the clinical innovation                                                                                 | c6_04                         |
| Revise professional roles                                                         | Shift and revise roles among professionals who provide care, and redesign job characteristics                                                                                                                | Revise professional roles                                          | Shift and revise roles among professionals who provide care, and redesign job characteristics                                                                                                                | c6_05                         |
| CONCEPT 7: Engage <i>consumers (priority populations)</i>                         |                                                                                                                                                                                                              | CONCEPT 7: Engage <b>target group</b>                              |                                                                                                                                                                                                              |                               |
| Increase demand                                                                   | Attempt to influence the market for the <i>clinical innovation</i> to increase competition intensity and to increase the maturity of the market for the <i>clinical innovation</i>                           | Increase demand                                                    | Attempt to influence the market for the <b>intervention</b> to increase competition intensity and to increase the maturity of the market for the <b>intervention</b>                                         | c7_01                         |
| Intervene with <i>patients/consumers and family members (priority population)</i> | Develop strategies <i>with patients</i> to encourage and problem solve around adherence                                                                                                                      | Intervene with <b>target group</b> to enhance uptake and adherence | Develop strategies with the <b>target group and/or their support network</b> to encourage and problem solve around adherence                                                                                 | c7_02                         |



| ORIGINAL WITH (COMMUNITY SETTING CHANGES)                                                       |                                                                                                                                                                                                                                                          | THIS RESEARCH                                                   |                                                                                                                                                                                           |                               |
|-------------------------------------------------------------------------------------------------|----------------------------------------------------------------------------------------------------------------------------------------------------------------------------------------------------------------------------------------------------------|-----------------------------------------------------------------|-------------------------------------------------------------------------------------------------------------------------------------------------------------------------------------------|-------------------------------|
| ERIC CONCEPTS & STRATEGIES                                                                      | DEFINITION                                                                                                                                                                                                                                               | CONCEPTS & STRATEGIES                                           | DEFINITION                                                                                                                                                                                | CONCEPT & STRATEGY IDENTIFIER |
| to enhance uptake and adherence                                                                 |                                                                                                                                                                                                                                                          |                                                                 |                                                                                                                                                                                           |                               |
| Involve <i>patients /consumers and family members (priority population and support network)</i> | Engage or include <i>patients/consumers and families</i> in the implementation effort                                                                                                                                                                    | Involve target group and support network                        | Engage or include the <b>target group and/or their support network</b> in the implementation effort                                                                                       | c7_03                         |
| Prepare <i>patient/consumers (priority population)</i> to actively participate                  | Prepare <i>patients/consumers</i> to be active in their <i>care</i> , to ask questions, and specifically to inquire about <i>care</i> guidelines, the evidence behind <i>clinical</i> decisions, or about <i>available evidence-supported treatments</i> | Prepare <b>target group</b> to actively participate             | Prepare the <b>target group</b> to be active in their <b>involvement</b> , to ask questions, and specifically to inquire about guidelines and the evidence behind the <b>intervention</b> | c7_04                         |
| Use mass media                                                                                  | Use media to reach large numbers of people to spread the word about the <i>clinical innovation</i>                                                                                                                                                       | Use mass media                                                  | Use media to reach large numbers of people to spread the word about the <b>intervention</b>                                                                                               | c7_05                         |
| CONCEPT 8: Financial strategies                                                                 |                                                                                                                                                                                                                                                          | CONCEPT 8: Financial strategies                                 |                                                                                                                                                                                           |                               |
| Access new funding                                                                              | Access new or existing money to facilitate the implementation                                                                                                                                                                                            | Access new funding                                              | Access new or existing money to facilitate the implementation                                                                                                                             | c8_01                         |
| Alter incentives/allowance structures for <i>clinicians</i>                                     | Work to incentivize the adoption and implementation of the <i>clinical innovation</i>                                                                                                                                                                    | Alter <b>provider</b> incentives/allowance structures           | Work to incentivize the adoption and implementation of the <b>intervention</b>                                                                                                            | c8_02                         |
| Alter <i>patient/consumer (end user)</i> fees                                                   | Create fee structures where <i>patients/consumers</i> pay less for preferred treatments (the <i>clinical innovation</i> ) and more for less-preferred treatments                                                                                         | Alter fees for <b>target group</b>                              | Create fee structures where the target group or their support network pay less for the <b>intervention (eg. community pool access)</b>                                                    | c8_03                         |
| Develop disincentives                                                                           | Provide financial disincentives for failure to implement or use the <i>clinical innovations</i>                                                                                                                                                          | Develop disincentives                                           | Provide financial disincentives for failure to implement or use the <b>intervention</b>                                                                                                   | c8_04                         |
| Fund and contract for the <i>clinical innovation (evidence-based programs)</i>                  | Governments and other payers of services issue requests for proposals to deliver the <i>innovation</i> , use contracting processes to motivate providers to deliver the <i>clinical innovation</i> , and develop                                         | Fund and contract for the <b>evidence-informed intervention</b> | Governments and other payers of services issue requests for proposals to deliver the intervention, use contracting processes to motivate providers to deliver the <b>intervention</b> ,   | c8_05                         |



| ORIGINAL WITH (COMMUNITY SETTING CHANGES)                                               |                                                                                                                                                                                                                                                                                                 | THIS RESEARCH                                                    |                                                                                                                                                                                                                                                                                   |                               |
|-----------------------------------------------------------------------------------------|-------------------------------------------------------------------------------------------------------------------------------------------------------------------------------------------------------------------------------------------------------------------------------------------------|------------------------------------------------------------------|-----------------------------------------------------------------------------------------------------------------------------------------------------------------------------------------------------------------------------------------------------------------------------------|-------------------------------|
| ERIC CONCEPTS & STRATEGIES                                                              | DEFINITION                                                                                                                                                                                                                                                                                      | CONCEPTS & STRATEGIES                                            | DEFINITION                                                                                                                                                                                                                                                                        | CONCEPT & STRATEGY IDENTIFIER |
|                                                                                         | new funding formulas that make it more likely that providers will deliver the <i>innovation</i>                                                                                                                                                                                                 |                                                                  | and develop new funding formulas that make it more likely that providers will deliver the <b>intervention</b>                                                                                                                                                                     |                               |
| Make billing easier                                                                     | Make it easier to bill for the <i>clinical innovation</i>                                                                                                                                                                                                                                       | *Make billing easier                                             | Make it easier to bill for the <b>intervention</b>                                                                                                                                                                                                                                | c8_06                         |
| Place <i>innovation</i> (evidence-based programs) on a fee-for-service list/formularies | Work to place the <i>clinical innovation</i> on lists of actions for which providers can be reimbursed (e.g., a drug is placed on a formulary, a procedure is now reimbursable)                                                                                                                 | Place <b>interventions</b> on a fee-for-service list/formularies | Work to place the <b>intervention</b> on lists of actions for which providers can be reimbursed (e.g. <b>pool fence compliance checks charged to pool owners</b> )                                                                                                                | c8_07                         |
| Use capitated payments                                                                  | Pay providers or care systems a set amount per patient/consumer for delivering <i>clinical care</i>                                                                                                                                                                                             | *Use capitated payments                                          | Pay providers a set amount per <b>target group member</b> for delivering the <b>intervention</b>                                                                                                                                                                                  | c8_08                         |
| Use other payment schemes                                                               | Introduce payment approaches (in a catch-all category)                                                                                                                                                                                                                                          | *Use other payment schemes                                       | Introduce payment approaches (in a catch-all category)                                                                                                                                                                                                                            | c8_09                         |
| CONCEPT 9: Change infrastructure                                                        |                                                                                                                                                                                                                                                                                                 | CONCEPT 9: Change infrastructure                                 |                                                                                                                                                                                                                                                                                   |                               |
| Change accreditation or membership requirements                                         | Strive to alter accreditation standards so that they require or encourage use of the <i>clinical innovation</i> . Work to alter membership organization requirements so that those who want to affiliate with the organization are encouraged or required to use the <i>clinical innovation</i> | *Change accreditation or membership requirements                 | Strive to alter accreditation standards so that they require or encourage use of the <b>intervention</b> . Work to alter membership organization requirements so that those who want to affiliate with the organization are encouraged or required to use the <b>intervention</b> | c9_01                         |
| Change liability laws                                                                   | Participate in liability reform efforts that make <i>clinicians</i> more willing to deliver the <i>clinical innovation</i>                                                                                                                                                                      | Change liability laws or enforcement                             | Participate in liability reform efforts that make <b>providers</b> more willing to deliver the <b>intervention</b>                                                                                                                                                                | c9_02                         |
| Change physical structure and equipment                                                 | Evaluate current configurations and adapt, as needed, the physical structure and/or equipment (e.g., changing the layout of a room, adding equipment) to best accommodate the targeted <i>innovation</i>                                                                                        | Change physical structure and equipment                          | Evaluate current configurations and adapt, as needed, the physical structure and/or equipment (e.g., changing the layout of a room, adding equipment) to best accommodate the targeted <b>intervention</b>                                                                        | c9_03                         |
| Change record systems                                                                   | Change records systems to allow better assessment of implementation or <i>clinical</i> outcomes                                                                                                                                                                                                 | Change record systems                                            | Change records systems to allow better assessment of implementation outcomes                                                                                                                                                                                                      | c9_04                         |



| ORIGINAL WITH (COMMUNITY SETTING CHANGES)                 |                                                                                                                                                                                                                                                                                                                                                                     | THIS RESEARCH                                              |                                                                                                                                                                                                                                                                                                                                                                          |                               |
|-----------------------------------------------------------|---------------------------------------------------------------------------------------------------------------------------------------------------------------------------------------------------------------------------------------------------------------------------------------------------------------------------------------------------------------------|------------------------------------------------------------|--------------------------------------------------------------------------------------------------------------------------------------------------------------------------------------------------------------------------------------------------------------------------------------------------------------------------------------------------------------------------|-------------------------------|
| ERIC CONCEPTS & STRATEGIES                                | DEFINITION                                                                                                                                                                                                                                                                                                                                                          | CONCEPTS & STRATEGIES                                      | DEFINITION                                                                                                                                                                                                                                                                                                                                                               | CONCEPT & STRATEGY IDENTIFIER |
| Change service sites                                      | Change the location of <i>clinical</i> service sites to increase access                                                                                                                                                                                                                                                                                             | Change service sites                                       | Change the location of service sites to increase access                                                                                                                                                                                                                                                                                                                  | c9_05                         |
| Create or change credentialing and or licensure standards | Create an organization that certifies <i>clinicians</i> in the <i>innovation</i> or encourage an existing organization to do so. Change governmental professional certification or licensure requirements to include delivering the <i>innovation</i> . Work to alter continuing education requirements to shape professional practice toward the <i>innovation</i> | *Create or change credentialing and or licensure standards | Create an organization that certifies <b>providers</b> in the <b>intervention</b> or encourage an existing organization to do so. Change governmental professional certification or licensure requirements to include delivering the <b>intervention</b> . Work to alter continuing education requirements to shape professional practice toward the <b>intervention</b> | c9_06                         |
| Mandate change                                            | Have leadership declare the priority of the <i>innovation</i> and their determination to have it implemented                                                                                                                                                                                                                                                        | Mandate change                                             | Have leadership declare the priority of the <b>intervention</b> and their determination to have it implemented                                                                                                                                                                                                                                                           | c9_07                         |
| Start a dissemination organisation                        | Identify or start a separate organization that is responsible for disseminating the <i>clinical innovation</i> . It could be a for-profit or non-profit organization                                                                                                                                                                                                | Start a dissemination organisation                         | Identify or start a separate organization that is responsible for disseminating the <b>intervention</b> . It could be a for-profit or non-profit organization                                                                                                                                                                                                            | c9_08                         |

\* indicates strategies of a technical/clinical nature, not expected to be seen in the literature

*Italicised text* indicates text removed from original ERIC strategies names and or definitions

**Bold text** indicates text added for this review

Bracketed text () indicates text added by Balis and colleagues to the original ERIC strategies

This table is adapted from previous work undertaken to develop and refine the Expert Recommendation for Implementing Change (ERIC) strategies. Columns 1 and 2 are adapted from Powell, B. J., Waltz, T. J., Chinman, M. J., Damschroder, L. J., Smith, J. L., Matthieu, M. M., Proctor, E. K., & Kirchner, J. E. (2015). A refined compilation of implementation strategies: results from the Expert Recommendations for Implementing Change (ERIC) project. *Implementation Science*, 10(1), 21. <https://doi.org/10.1186/s13012-015-0209-1>;

Waltz, T. J., Powell, B. J., Matthieu, M. M., Damschroder, L. J., Chinman, M. J., Smith, J. L., Proctor, E. K., & Kirchner, J. E. (2015). Use of concept mapping to characterize relationships among implementation strategies and assess their feasibility and importance: results from the Expert Recommendations for Implementing Change (ERIC) study. *Implementation Science*, 10(1). <https://doi.org/10.1186/s13012-015-0295-0>; and Brackets in column 1 and 2 indicate changes to text made by:

Balis, L. E., Houghtaling, B., & Harden, S. M. (2022). Using implementation strategies in community settings: an introduction to the Expert Recommendations for Implementing Change (ERIC) compilation and future directions. *Translational Behavioral Medicine*, 12(10), 965-978. <https://doi.org/10.1093/tbm/ibac061>

This highlights the changes made to ERIC strategies and concepts to adapt from clinical to a community setting by those authors. Italicised text indicates where changes were made for the current study.

Column 3 and 4 highlight changes made to the ERIC concept and strategy names and definitions (developed for both original clinical and community setting) for this systematic review (in bold text).
